# Supplementary material for: Unraveling the Role of Toll-like Receptors in the Immunopathogenesis of Selected Primary and Secondary Immunodeficiencies
Source: MDPI journal article supplement (doi:10.3390/cells12162055), 2023-08-12
Supplement: s1 [file s1]

**Supplementary Table S1.** ROC analysis for CVID nad CLL patients in relations to healthy volunteers

| Parametrs                    |             | CVID vs. Healthy volunteers | CLL vs. Healthy volunteers |
|------------------------------|-------------|-----------------------------|----------------------------|
| CD4+/TLR2+ T lymphocytes [%] | AUC         | 1,00                        | 0,964                      |
|                              | SE          | 0,00                        | 0,021                      |
|                              | +95%        | 1,00                        | 0,924                      |
|                              | -95%        | 1,00                        | 1,00                       |
|                              | Z statistic | -                           | 22,527                     |
|                              | p-value     | 0,000*                      | 0,000*                     |
| CD8+TLR2+ T lymphocytes [%]  | AUC         | 1,00                        | 1,00                       |
|                              | SE          | 0,00                        | 0,00                       |
|                              | +95%        | 1,00                        | 1,00                       |
|                              | -95%        | 1,00                        | 1,00                       |
|                              | Z statistic | -                           | -                          |
|                              | p-value     | 0,000*                      | 0,000*                     |
| CD19+TLR2+ B lymphocytes [%] | AUC         | 0,950                       | 1,00                       |
|                              | SE          | 0,022                       | 0,00                       |
|                              | +95%        | 0,906                       | 1,00                       |
|                              | -95%        | 0,993                       | 1,00                       |
|                              | Z statistic | 20,201                      | -                          |
|                              | p-value     | 0,000*                      | 0,000*                     |
| CD4+/TLR3+ T lymphocytes [%] | AUC         | 0,874                       | 0,909                      |
|                              | SE          | 0,037                       | 0,033                      |
|                              | +95%        | 0,802                       | 0,845                      |
|                              | -95%        | 0,947                       | 0,973                      |
|                              | Z statistic | 10,119                      | 12,526                     |
|                              | p-value     | 0,000*                      | 0,000*                     |
| CD8+TLR3+ T lymphocytes [%]  | AUC         | 0,842                       | 0,821                      |
|                              | SE          | 0,043                       | 0,048                      |
|                              | +95%        | 0,757                       | 0,726                      |
|                              | -95%        | 0,927                       | 0,916                      |
|                              | Z statistic | 7,901                       | 6,631                      |
|                              | p-value     | 0,000*                      | 0,000*                     |
| CD19+TLR3+ B lymphocytes [%] | AUC         | 0,617                       | 0,999                      |
|                              | SE          | 0,065                       | 0,001                      |
|                              | +95%        | 0,491                       | 0,997                      |
|                              | -95%        | 0,744                       | 1,00                       |
|                              | Z statistic | 1,815                       | 469,138                    |
|                              | p-value     | 0,069                       | 0,000*                     |
| CD4+/TLR4+ T lymphocytes [%] | AUC         | 0,972                       | 1,00                       |
|                              | SE          | 0,014                       | 0,00                       |
|                              | +95%        | 0,944                       | 1,00                       |
|                              | -95%        | 0,999                       | 1,00                       |
|                              | Z statistic | 33,533                      | -                          |
|                              | p-value     | 0,000*                      | 0,000*                     |
| CD8+TLR4+ T lymphocytes [%]  | AUC         | 1,00                        | 1,00                       |
|                              | SE          | 0,00                        | 0,00                       |
|                              | +95%        | 1,00                        | 1,00                       |
|                              | -95%        | 1,00                        | 1,00                       |

|                                     |             |          |         |
|-------------------------------------|-------------|----------|---------|
|                                     | Z statistic | -        | -       |
|                                     | p-value     | 0,000*   | 0,000*  |
| <b>CD19+TLR4+ B lymphocytes [%]</b> | AUC         | 0,338    | 1,00    |
|                                     | SE          | 0,061    | 0,00    |
|                                     | +95%        | 0,219    | 1,00    |
|                                     | -95%        | 0,457    | 1,00    |
|                                     | Z statistic | -2,667   | -       |
|                                     | p-value     | 0,007*   | 0,000*  |
| <b>CD4+/TLR7+ T lymphocytes [%]</b> | AUC         | 0,003    | 0,998   |
|                                     | SE          | 0,003    | 0,002   |
|                                     | +95%        | -0,003   | 0,993   |
|                                     | -95%        | 0,008    | 1,00    |
|                                     | Z statistic | -167,034 | 211,089 |
|                                     | p-value     | 0,000*   | 0,000*  |
| <b>CD8+TLR7+ T lymphocytes [%]</b>  | AUC         | 0,011    | 0,880   |
|                                     | SE          | 0,007    | 0,037   |
|                                     | +95%        | -0,004   | 0,807   |
|                                     | -95%        | 0,025    | 0,953   |
|                                     | Z statistic | -67,308  | 10,201  |
|                                     | p-value     | 0,000*   | 0,000*  |
| <b>CD19+TLR7+ B lymphocytes [%]</b> | AUC         | 0,003    | 1,00    |
|                                     | SE          | 0,003    | 0,00    |
|                                     | +95%        | -0,003   | 1,00    |
|                                     | -95%        | 0,008    | 1,00    |
|                                     | Z statistic | -167,034 | -       |
|                                     | p-value     | 0,000*   | 0,000*  |
| <b>CD4+/TLR8+ T lymphocytes [%]</b> | AUC         | 0,047    | 0,933   |
|                                     | SE          | 0,002    | 0,026   |
|                                     | +95%        | -0,004   | 0,882   |
|                                     | -95%        | 0,086    | 0,984   |
|                                     | Z statistic | -22,580  | 16,71   |
|                                     | p-value     | 0,000*   | 0,000*  |
| <b>CD8+TLR8+ T lymphocytes [%]</b>  | AUC         | 1,00     | 0,926   |
|                                     | SE          | 0,00     | 0,033   |
|                                     | +95%        | 1,00     | 0,861   |
|                                     | -95%        | 1,00     | 0,991   |
|                                     | Z statistic | -        | 12,821  |
|                                     | p-value     | 0,000*   | 0,000*  |
| <b>CD19+TLR8+ B lymphocytes [%]</b> | AUC         | 0,004    | 0,0993  |
|                                     | SE          | 0,0004   | 0,007   |
|                                     | +95%        | -0,004   | 0,980   |
|                                     | -95%        | 0,012    | 1,00    |
|                                     | Z statistic | -122,904 | 73,201  |
|                                     | p-value     | 0,000*   | 0,000*  |
| <b>CD4+/TLR9+ T lymphocytes [%]</b> | AUC         | 1,00     | 1,00    |
|                                     | SE          | 0,00     | 0,00    |
|                                     | +95%        | 1,00     | 1,00    |
|                                     | -95%        | 1,00     | 1,00    |
|                                     | Z statistic | -        | -       |
|                                     | p-value     | 0,000*   | 0,000*  |

|                                          |             |        |        |
|------------------------------------------|-------------|--------|--------|
| <b>CD8+TLR9+ T lymphocytes [%]</b>       | AUC         | 1,00   | 1,00   |
|                                          | SE          | 0,00   | 0,00   |
|                                          | +95%        | 1,00   | 1,00   |
|                                          | -95%        | 1,00   | 1,00   |
|                                          | Z statistic | -      | -      |
|                                          | p-value     | 0,000* | 0,000* |
| <b>CD19+TLR9+ B lymphocytes [%]</b>      | AUC         | 1,00   | 1,00   |
|                                          | SE          | 0,00   | 0,00   |
|                                          | +95%        | 1,00   | 1,00   |
|                                          | -95%        | 1,00   | 1,00   |
|                                          | Z statistic | -      | -      |
|                                          | p-value     | 0,000* | 0,000* |
| <b>Serum concentration sTLR2 [ng/ml]</b> | AUC         | 1,00   | 1,00   |
|                                          | SE          | 0,00   | 0,00   |
|                                          | +95%        | 1,00   | 1,00   |
|                                          | -95%        | 1,00   | 1,00   |
|                                          | Z statistic | -      | -      |
|                                          | p-value     | 0,000* | 0,000* |
| <b>Serum concentration sTLR3 [ng/ml]</b> | AUC         | 1,00   | 1,00   |
|                                          | SE          | 0,00   | 0,00   |
|                                          | +95%        | 1,00   | 1,00   |
|                                          | -95%        | 1,00   | 1,00   |
|                                          | Z statistic | -      | -      |
|                                          | p-value     | 0,000* | 0,000* |
| <b>Serum concentration sTLR4 [ng/ml]</b> | AUC         | 1,00   | 1,00   |
|                                          | SE          | 0,00   | 0,00   |
|                                          | +95%        | 1,00   | 1,00   |
|                                          | -95%        | 1,00   | 1,00   |
|                                          | Z statistic | -      | -      |
|                                          | p-value     | 0,000* | 0,000* |
| <b>Serum concentration sTLR7 [ng/ml]</b> | AUC         | 1,00   | 1,00   |
|                                          | SE          | 0,00   | 0,00   |
|                                          | +95%        | 1,00   | 1,00   |
|                                          | -95%        | 1,00   | 1,00   |
|                                          | Z statistic | -      | -      |
|                                          | p-value     | 0,000* | 0,000* |
| <b>Serum concentration sTLR8 [ng/ml]</b> | AUC         | 1,00   | 1,00   |
|                                          | SE          | 0,00   | 0,00   |
|                                          | +95%        | 1,00   | 1,00   |
|                                          | -95%        | 1,00   | 1,00   |
|                                          | Z statistic | -      | -      |
|                                          | p-value     | 0,000* | 0,000* |
| <b>Serum concentration sTLR9 [ng/ml]</b> | AUC         | 1,00   | 1,00   |
|                                          | SE          | 0,00   | 0,00   |
|                                          | +95%        | 1,00   | 1,00   |
|                                          | -95%        | 1,00   | 1,00   |
|                                          | Z statistic | -      | -      |
|                                          | p-value     | 0,000* | 0,000* |

\* Statistically significant results.
